# Supplementary material
Source: PubMed Central journal article supplement (PMC3076817)
Supplement: 0914274108_pnas.200914274SI.pdf [file 0914274108_pnas.200914274SI.pdf]

# Supporting Information

Gignoux et al. 10.1073/pnas.0914274108

## SI Materials and Methods

**Selection of Haplogroups.** We chose haplogroups in each region based on prior TMRCA affiliation with either the Holocene, Last Glacial, or Upper Paleolithic periods. In each case, we used haplogroups on both sides of the major phylogenetic divisions to minimize lineage-specific biases: both M and N in eastern Asia; both R and non-R lineages in Europe (H and non-H); and L0 vs. L2/3 in Africa. The haplogroups from the Holocene, Last Glacial, and Upper Paleolithic collections are all representative of populous lineages within their respective continents (1–3).

**Europe.** We chose haplogroups associated with an origin in Near Eastern populations during the Holocene: T1, T2, J1a, K2a, and H4a. These haplogroups (T1, T2, J1a, and K) all appear to have Near Eastern founders that migrated to Europe after the Younger Dryas (2). After inspecting the haplogroup K network in Behar et al. (4), we chose the subgroup K2a, which appears to be present in the Near East (including non-Ashkenazi Jews) and European populations (but not North Africa). Haplogroup H4a is thought to have expanded throughout Europe during the Neolithic (5). However, the location of its origin is still not certain (6). Removing H4a from the Skyline analysis did not substantively change the timing of Holocene period expansion (results not shown). European haplogroups U5, V, and 3H are associated with an indigenous origin in Europe (2). Haplogroups U5a, U5b1, V, and 3H have all been attributed a TMRCA during the Last Glacial Period (2, 7–9).

**Africa.** Haplogroups associated with the Neolithic expansion in Africa include L0a2, L2a1, L3d, and L3e2. L0a2 (formerly L1a2) has been associated with a Holocene origin in tropical Africa, then eastern and southeastern dispersals of the Bantu-speaking populations (3). Haplogroup L2a1 has an origin in western Africa, but a current pan-African distribution. There is a clear signature of L2a1 in Bantu-speaking groups (3). Haplogroup L3d originated 30,000 ya, likely in western Africa, and has been associated with the Bantu-speaking migration into southern Africa (3, 10).

**Eastern Asia.** Haplogroups associated with Holocene period migrations in eastern Asia include B4a1, F1a, and E1. Haplogroup B4a1 and its subgroups are most well known for their association with the Polynesian agricultural expansion. B4a is present in China, Taiwan, Japan, and Mainland/Island Southeast Asia (1, 11). B4a1a and subgroups appear to coalesce at/or less than 12Kya (12, 13). F1a is distributed throughout China, Island Southeast Asia, Taiwan, Japan, and Thailand (1, 11). The primary subgroups of F1a (i.e., F1a1a, F1a2, F1a3, F1a4) are all younger than 10 Kya (1). Subhaplogroups E1a and E1b (the only two subgroups of E1) have been recently accorded a phylogeographic origin in island southeastern Asia (e.g., Taiwan, Indonesia, Melanesia) dating to <12 Kya (13, 14).

**Papua New Guinea.** To investigate a signal of Asian population growth that should clearly predate the Holocene, we looked to lineages known to be indigenous to highland Papua New Guinean populations. Haplogroups P1, P2, P4a, and Q3 are derived from the initial Upper Paleolithic settlement of Oceania >40 Kya (15).

After determining the set of haplogroups for analysis, we searched for these select haplogroups in a database built from publicly available complete mitochondrial coding region sequences in GenBank. We assigned a precise haplogroup affiliation for each individual by our own internal algorithm, which may differ from the recorded GenBank affiliation if it was included in the accession information.

We would have liked to include Native American lineages in this analysis, because there is a well-supported archaeological record for the independent development of agriculture in the Americas. However, few American haplogroups are specifically associated with regions where agriculture developed 5,000 ya. Additionally, there is a paucity of complete mitochondrial coding region sequences in regions of large-scale agricultural production (central America and the Andean highlands). Recent Bayesian Skyline analysis of all Native American haplogroups reflects the expansion of these lineages after the initial colonization of the Americas during the Last Glacial Period (16, 17).

**Accession Information for All Samples.** European Neolithic sample ( $n = 144$ ):

EF177410, EF657445, AY495286, AY495275, AY495281, EF657401, EF660992, DQ523649, EF657755, EF657285, AY495282, AY195767, EF657345, EF657455, AY495304, AY495302, EF661001, EU007862, DQ112814, EF660978, AY495277, EF657604, AY339568, AY495291, EF657448, AY495289, EF657427, EF657777, DQ112892, AY495288, AY495290, AY495297, EF657397, EF177409, EF657240, AF382006, DQ112817, DQ112943, AY339570, EF657686, AY495292, AY339574, EF657430, AY339572, AY339575, AY339576, EF177431, DQ112800, AY495201, DQ358973, EF657649, AY495222, AY495211, AY339585, EF657620, AY495230, AY495212, EF657300, EF657560, AY495195, AY495217, AY495226, AY495216, AY495229, DQ112793, AY339587, AY495228, EF660981, AY495221, DQ523659, EF657573, AY495192, EU130562, EF657656, AY495193, EF449507, EU130942, AY495190, AY339423, EF657619, AY495191, EF657456, EF657787, AY495189, AY339425, AY495188, EU215517, EF657479, EU200235, AY495194, AY738972, EF177447, AY339422, EF657629, EF657721, AY339424, EF609015, AY495178, EF657496, EF657776, AY495183, AY495184, AY495123, EF657298, EF660991, EF657270, DQ523646, EF657591, EF657783, EU200347, AY495181, EF657469, AY495179, AY495095, EF657767, DQ358977, AY495111, AY495186, EF177440, EF657728, EU051827, DQ282493, DQ282501, AY495246, DQ282502, AY495244, AY495247, DQ282504, EF657602, EU130564, AY495241, DQ282495, EF657526, EF657610, DQ282497, EF657244, DQ282499, AY495252, AY495242, EF657273, EF657453, AY495249, DQ282498, DQ282503

European Last Glacial Period sample ( $n = 65$ ):

EF657653, EF657646, EF660946, AY495310, EF657696, AY738947, EF657467, EF661005, EF657709, EF657444, AY495325, EF657364, AM260578, AY738986, AM260575, EU140330, AY495323, AY339442, AY738991, AY339440, AY882411, EF657233, EF660930, AM260562, AY738990, EF397754, EF657259, EF657784, AY495322, EF657328, DQ112837, AY339526, AM260564, EU140744, AM260591, AY882409, AY495317, AY339434, AY495313, EF657684, AY339441, DQ661681, AM260576, EF177435, EF177419, EF660950, EF657245, EF657594, EF657320, AY339523, EF657657, AY882399, AM260572, AY882410, EF657274, AY339437, DQ112808, EF660980, AY495319, AY339445, DQ489521, AY339435, EU140332, DQ112890, EF657616

African Neolithic sample ( $n = 84$ ):

AF346967, AF346977, AF346994, AF346998, AF346999, AF347014, AF347015, AF381998, AM711903, AY195782, DQ112686, DQ112687, DQ112688, DQ112689, DQ112713,

DQ112714, DQ112715, DQ112716, DQ112722, DQ112739, DQ112744, DQ112747, DQ112756, DQ112847, DQ112848, DQ112851, DQ112853, DQ112857, DQ112884, DQ112901, DQ112904, DQ112906, DQ112917, DQ112918, DQ112923, DQ112949, DQ112953, DQ304968, DQ304969, DQ304970, DQ304971, DQ304972, DQ304973, DQ304974, DQ304975, DQ304976, DQ304977, DQ304998, DQ304999, DQ305002, DQ305004, DQ305005, DQ305007, DQ305009, DQ305010, DQ305012, DQ305013, DQ305015, DQ305016, DQ305017, DQ305018, DQ305019, DQ305020, DQ305022, DQ305023, DQ341058, DQ341070, DQ341071, DQ341072, EF184602, EF184603, EF184604, EF184605, EF184606, EF184607, EF184608, EF184623, EF184628, EF184641, EF657277, EF657286, EF657544, EF657580, HUMMTA

African Upper Paleolithic sample ( $n = 38$ ):

EF184592, EF184586, EF184593, EF184591, EF184590, AY195777, EF184594, EF184610, AF347009, AF347008, EF184611, EF184609, L498, L488, L500, L490, L583, L491, L503, L342, L487, L501, L334, L505, L524, L502, L493, L521, L520, L504, L516, L499, L492, L441, L515, L506, L496, L513

East Asian Neolithic sample ( $n = 72$ ):

AF347007, AJ842744, AJ842745, AJ842746, AJ842747, AJ842748, AJ842749, AP008257, AP008279, AP008338, AP008347, AP008384, AP008475, AP008567, AP008658, AP008667, AP008679, AP008691, AP008701, AP008733, AP008774, AP008798, AP008906, AY195770, AY195791, AY255175, AY289068, AY289069, AY289076, AY289077, AY289080, AY289083, AY289093, AY289094, AY289099, AY289102, AY519492, AY519495, AY950289, AY963572, AY963574, DQ272120, DQ272124, DQ372871, DQ372873, DQ372874, DQ372875, DQ372877, DQ372878, DQ372881, DQ372886, DQ834261, EF061151, EF061152, EF093535, EF093536, EF093538, EF093539, EF093540, EF093544, EF093548, EF093551, EF093552, EF093553, EF093556, EF093557, EF093558, EF114270, EF114271, EF114272, EF114288, EF114289

Papua New Guinea Upper Paleolithic sample ( $n = 20$ ):

DQ112896, DQ112895, AY289079, DQ112898, AY289089, AY289078, EF061158, EF061155, DQ372870, EF495215, DQ372872, AY289084, AY289088, DQ112897, AF347002, AF347004, AY289087, AY289086, AF347005, AY289092

- Hill C, et al. (2007) A mitochondrial stratigraphy for island southeast Asia. *Am J Hum Genet* 80:29–43.
- Richards M, et al. (2000) Tracing European founder lineages in the Near Eastern mtDNA pool. *Am J Hum Genet* 67:1251–1276.
- Salas A, et al. (2002) The making of the African mtDNA landscape. *Am J Hum Genet* 71:1082–1111.
- Behar DM, et al. (2006) The matrilineal ancestry of Ashkenazi Jewry: Portrait of a recent founder event. *Am J Hum Genet* 78:487–497.
- Brandstatter A, et al. (2008) Timing and deciphering mitochondrial DNA macro-haplogroup R0 variability in Central Europe and Middle East. *BMC Evol Biol* 8:8.
- Roostalu U, et al. (2007) Origin and expansion of haplogroup H, the dominant human mitochondrial DNA lineage in West Eurasia: The Near Eastern and Caucasian perspective. *Mol Biol Evol* 24:436–448.
- Achilli A, et al. (2005) Saami and Berbers—an unexpected mitochondrial DNA link. *Am J Hum Genet* 76:883–886.
- Achilli A, et al. (2004) The molecular dissection of mtDNA haplogroup H confirms that the Franco-Cantabrian glacial refuge was a major source for the European gene pool. *Am J Hum Genet* 75:910–918.
- Torroni A, et al. (2001) A signal, from human mtDNA, of postglacial recolonization in Europe. *Am J Hum Genet* 69:844–852.
- Beleza S, Gusmão L, Amorim A, Carracedo A, Salas A (2005) The genetic legacy of western Bantu migrations. *Hum Genet* 117:366–375.
- Tanaka M, et al. (2004) Mitochondrial genome variation in eastern Asia and the peopling of Japan. *Genome Res* 14(10A):1832–1850.
- Pierson MJ, et al. (2006) Deciphering past human population movements in Oceania: provably optimal trees of 127 mtDNA genomes. *Mol Biol Evol* 23:1966–1975.
- Trejaut JA, et al. (2005) Traces of archaic mitochondrial lineages persist in Austronesian-speaking Formosan populations. *PLoS Biol* 3:e247.
- Soares P, et al. (2008) Climate change and postglacial human dispersals in southeast Asia. *Mol Biol Evol* 25:1209–1218.
- Friedlaender JS, et al. (2007) Melanesian mtDNA complexity. *PLoS ONE* 2:e248.
- Ho SYW, Endicott P (2008) The crucial role of calibration in molecular date estimates for the peopling of the Americas. *Am J Hum Genet* 83:142–146, author reply 146–147.
- Kitchen A, Miyamoto MM, Mulligan CJ (2008) A three-stage colonization model for the peopling of the Americas. *PLoS ONE* 3:e1596.
- Voight BF, et al. (2005) Interrogating multiple aspects of variation in a full resequencing data set to infer human population size changes. *Proc Natl Acad Sci USA* 102:18508–18513.
- Zhivotovsky LA, Rosenberg NA, Feldman MW (2003) Features of evolution and expansion of modern humans, inferred from genome-wide microsatellite markers. *Am J Hum Genet* 72:1171–1186.
- Pinhasi R, Fort J, Ammerman AJ (2005) Tracing the origin and spread of agriculture in Europe. *PLoS Biol* 3:e410.
